# Supplementary material
Source: HighWire-hosted journal article supplement (https://jmg.bmj.com/content/jmedgenet-2020-106970)
Supplement: inline-supplementary-material-4 [file inline-supplementary-material-4.xlsx]

## Sheet: Sheet1
Supplementary table 5. List of novel variants deposited in dbSNP
dbSNP ID
rs1012991952
rs1022076404
rs1048366129
rs1049843561
rs1051733998
rs1057520402
rs1057522769
rs1060502379
rs11571673
rs1161074446
rs1162815279
rs1168113546
rs1196010073
rs1220029489
rs1229638410
rs1239134504
rs1239851422
rs1240140012
rs1241929806
rs1263784177
rs1267019068
rs1273859752
rs1277198334
rs1277709335
rs1280354443
rs1292432673
rs1300767562
rs1364137337
rs1367226415
rs1384728821
rs1404502873
rs1415787700
rs1415860458
rs1422993794
rs1426396177
rs1426791260
rs1433837455
rs1447426729
rs1472415736
rs147856441
rs1478704441
rs1485534075
rs1555286886
rs1555287728
rs1555287798
rs1555288596
rs1555577001
rs1555599182
rs1566214695
rs1566215971
rs1566218040
rs1566218060
rs1566218277
rs1566218281
rs1566218287
rs1566218297
rs1566218871
rs1566218899
rs1566219064
rs1566219075
rs1566219468
rs1566219474
rs1566219479
rs1566219490
rs1566219495
rs1566219498
rs1566219501
rs1566220500
rs1566220695
rs1566220739
rs1566221222
rs1566221562
rs1566222022
rs1566222030
rs1566224667
rs1566224709
rs1566224726
rs1566224730
rs1566224739
rs1566225677
rs1566225680
rs1566225680
rs1566225689
rs1566225733
rs1566225759
rs1566227892
rs1566228704
rs1566229922
rs1566230378
rs1566230738
rs1566231290
rs1566232155
rs1566232411
rs1566234321
rs1566235535
rs1566235537
rs1566235569
rs1566235571
rs1566235573
rs1566235580
rs1566235585
rs1566235585
rs1566236754
rs1566236757
rs1566236759
rs1566236762
rs1566236772
rs1566236773
rs1566236778
rs1566236780
rs1566236781
rs1566236784
rs1566236789
rs1566236791
rs1566236793
rs1566236799
rs1566236802
rs1566236808
rs1566236822
rs1566236832
rs1566236837
rs1566236840
rs1566236841
rs1566236843
rs1566236846
rs1566237041
rs1566237054
rs1566237060
rs1566237069
rs1566237076
rs1566237078
rs1566237684
rs1566237688
rs1566237710
rs1566237713
rs1566237904
rs1566237912
rs1566237914
rs1566237918
rs1566237921
rs1566237923
rs1566237926
rs1566237929
rs1566237931
rs1566237947
rs1566237953
rs1566241833
rs1566242255
rs1566242583
rs1566242601
rs1566242970
rs1566244634
rs1566244645
rs1566245023
rs1566245033
rs1566245054
rs1566245984
rs1566245989
rs1566248570
rs1566248581
rs1566249134
rs1566249438
rs1566249445
rs1566249456
rs1566249480
rs1566249483
rs1566249493
rs1566249500
rs1566249501
rs1566249505
rs1566249508
rs1566249511
rs1566249519
rs1566249522
rs1566249528
rs1566251303
rs1566251304
rs1566251324
rs1566251585
rs1566252887
rs1566252912
rs1566252918
rs1566252918
rs1566252932
rs1566252942
rs1566253412
rs1566253449
rs1566253680
rs1566253718
rs1566253733
rs1566258698
rs1566258750
rs1566260011
rs1566260012
rs1566260318
rs1566260321
rs1566260687
rs1566260692
rs1566260695
rs1566260700
rs1566260713
rs1566261689
rs1566261757
rs1566261763
rs1567756806
rs1567757732
rs1567757742
rs1567757752
rs1567758798
rs1567758825
rs1567759201
rs1567759232
rs1567759237
rs1567760430
rs1567760695
rs1567760773
rs1567764728
rs1567764740
rs1567764747
rs1567768861
rs1567768915
rs1567769661
rs1567778370
rs1567782906
rs1567783726
rs1567788670
rs1567788677
rs1567788870
rs1567788876
rs1567788925
rs1567789034
rs1567791230
rs1567791874
rs1567793358
rs1567793561
rs1567796086
rs1567797331
rs1567800181
rs1567800197
rs1567800325
rs1567801483
rs1567801816
rs1567802541
rs1567803295
rs1567803295
rs1567804048
rs1567804068
rs1567804091
rs1567804095
rs1567804109
rs1567804153
rs1567804330
rs1567804376
rs1567804389
rs1567804395
rs1567804419
rs1567804427
rs1567805839
rs1567806075
rs1567806442
rs1567806508
rs1567809714
rs1567809717
rs1567809719
rs1567809721
rs1567809725
rs1567809728
rs1567809750
rs1567809755
rs1567809760
rs1567809764
rs1567809775
rs1567809778
rs1567809798
rs1567809803
rs1567809815
rs1567809819
rs1567809830
rs1567809834
rs1567809854
rs1567809859
rs1567809860
rs1567809890
rs1567809894
rs1567809898
rs1567809905
rs1567809910
rs1567809917
rs1567809919
rs1567809950
rs1567809966
rs1567809980
rs1567810037
rs1567810667
rs1567810949
rs1567811327
rs1567812071
rs1567812111
rs1567812556
rs1567812564
rs1567817733
rs1567817738
rs1567817742
rs1567818006
rs1567818030
rs1567818172
rs1567818175
rs1567823033
rs1567823045
rs1567823060
rs1567823062
rs1567823079
rs1567823082
rs1567823093
rs1567823106
rs1567823527
rs1567823528
rs1567823580
rs180905862
rs200067487
rs200513210
rs273900712
rs276174895
rs373413425
rs397507254
rs397507419
rs536390258
rs540770943
rs747694453
rs748503722
rs763395672
rs766977431
rs769333432
rs770385797
rs771121021
rs774420598
rs778735627
rs780869838
rs799923
rs80357031
rs80357633
rs80358003
rs81002869
rs869087267
rs876660940
rs878854956
rs909186565
rs912388182
rs922563714
rs929583740
rs933399306
rs966550945
