# Supplementary material
Source: HighWire-hosted journal article supplement (https://jmg.bmj.com/content/jmedgenet-2020-106970)
Supplement: inline-supplementary-material-5 [file inline-supplementary-material-5.xlsx]

## Sheet: Sheet1
Supplementary Table 2. Pathogenic variants identified in the 11,386 individuals
Chr.	Start	End	Ref	Alt.	cDNA change	AA Change	avsnp150	No. carrier	Gender	Genotype	Func.refGene	Type	Reported	CLNSIG (20190305)
BRCA1
chr17	41197766	41197766	T	-	c.5521delA	p.Ser1841fs	rs80357721	2	1F,1M	2 Het	exonic	frameshift deletion	ENIGMA|ClinVar|LOVD|BIC|dbBRCA-Chinese|BMD|BED	Pathogenic
chr17	41201137	41201137	C	T	c.5406+1G>A	.	rs80358028	1	1F	1 Het	splicing	.	ClinVar|LOVD|BIC|BMD|BED	Pathogenic
chr17	41234451	41234451	G	A	c.4327C>T	p.Arg1443Ter	rs41293455	1	1F	1 Het	exonic	stopgain	ENIGMA|ClinVar|LOVD|BIC|dbBRCA-Chinese|BED	Pathogenic
chr17	41244254	41244254	A	-	c.3294delT	p.Leu1098fs	rs876658626	1	1F	1 Het	exonic	frameshift deletion	ENIGMA|ClinVar|dbBRCA-Chinese|BED	Pathogenic
chr17	41244976	41244976	G	A	c.2572C>T	p.Gln858Ter	rs397508983	1	1F	1 Het	exonic	stopgain	ENIGMA|ClinVar|LOVD|dbBRCA-Chinese|BED	Pathogenic
chr17	41245246	41245246	T	-	c.2302delA	p.Ser768fs	.	1	1F	1 Het	exonic	frameshift deletion	ENIGMA|ClinVar|dbBRCA-Chinese|BED	Pathogenic
chr17	41245255	41245255	C	A	c.2293G>T	p.Glu765Ter	rs80357449	1	1F	1 Het	exonic	stopgain	ENIGMA|ClinVar|LOVD|BIC|BED	Pathogenic
chr17	41246040	41246044	TTTAA	-	c.1504_1508delTTAAA	p.Leu502fs	rs80357888	1	1F	1 Het	exonic	frameshift deletion	ENIGMA|ClinVar|LOVD|BIC|BED|dbBRCA-Chinese	Pathogenic
chr17	41246532	41246532	T	-	c.1016delA	p.Lys339fs	rs80357618	1	1F	1 Het	exonic	frameshift deletion	ENIGMA|ClinVar|LOVD|BIC|dbBRCA-Chinese|BED	Pathogenic
chr17	41246586	41246586	-	ATCT	c.961_962insAGAT	p.Trp321_Ala322delinsX	.	2	2F	2 Het	exonic	stopgain	ClinVar	Pathogenic
chr17	41246586	41246586	C	T	c.962G>A	p.Trp321Ter	rs80357292	1	1F	1 Het	exonic	stopgain	ENIGMA|ClinVar|LOVD|BIC|dbBRCA-Chinese|BED	Pathogenic
BRCA2
chr13	32900376	32900376	C	A	c.476-3C>A	.	rs371431745	2	2F	2 Het	intronic	.	ClinVar|LOVD|dbBRCA-Chinese|BED	Pathogenic
chr13	32903605	32903606	TG	-	c.657_658delTG	p.Thr219fs	rs80359604	2	2F	2 Het	exonic	frameshift deletion	ClinVar|dbBRCA-Chinese	Pathogenic
chr13	32910768	32910769	TT	-	c.2276_2277delTT	p.Leu759fs	rs886040421	1	1F	1 Het	exonic	frameshift deletion	ClinVar	Pathogenic
chr13	32911655	32911658	AATC	-	c.3163_3166delAATC	p.Asn1055fs	rs1566227892*	2	1F,1M	2 Het	exonic	frameshift deletion	ClinVar|dbBRCA-Chinese	Pathogenic
chr13	32911709	32911709	C	T	c.3217C>T	p.Gln1073Ter	rs886040464	1	1F	1 Het	exonic	stopgain	ENIGMA|ClinVar|LOVD|dbBRCA-Chinese|BMD|BED	Pathogenic
chr13	32912959	32912966	A	delAATACTGAinsTGTTTTT	c.4467_4474delAATACTGAinsTGTTTTT	p.Lys1489Asnfs	rs886040533	1	1F	N/A	exonic	frameshift deletion	BMD|dbBRCA-Chinese|ClinVar	Pathogenic
chr13	32913166	32913166	T	-	c.4674delT	p.Ser1558fs	rs1064794708	1	1F	1 Het	exonic	frameshift deletion	ClinVar	Pathogenic
chr13	32913558	32913558	-	A	c.5067dupA	p.Ala1689fs	rs80359480	1	1F	1 Het	exonic	frameshift insertion	dbBRCA-Chinese|ClinVar	Pathogenic
chr13	32913656	32913657	AG	-	c.5164_5165delAG	p.Ser1722fs	rs80359490	2	2F	2 Het	exonic	frameshift deletion	ENIGMA|ClinVar|LOVD|BIC|dbBRCA-Chinese|BMD|BED	Pathogenic
chr13	32914066	32914069	AATT	-	c.5574_5577delAATT	p.Thr1858fs	rs80359520	2	2F	2 Het	exonic	frameshift deletion	dbBRCA-Chinese|ClinVar	Pathogenic
chr13	32914091	32914094	ACAG	-	c.5599_5602delACAG	p.Thr1867fs	rs397507356	1	1F	1 Het	exonic	frameshift deletion	dbBRCA-Chinese|ClinVar	Pathogenic
chr13	32914137	32914137	C	A	c.5645C>A	p.Ser1882Ter	rs80358785	2	1F,1M	2 Het	exonic	stopgain	ENIGMA|ClinVar|LOVD|BIC|dbBRCA-Chinese|BMD|BED	Pathogenic
chr13	32914172	32914172	-	A	c.5681dupA	p.Tyr1894_Glu1895delinsX	rs80359527	1	1M	1 Het	exonic	stopgain	ENIGMA|ClinVar|BIC|dbBRCA-Chinese|BMD|BED	Pathogenic
chr13	32914174	32914174	C	G	c.5682C>G	p.Tyr1894Ter	rs41293497	1	1M	1 Het	exonic	stopgain	ENIGMA|ClinVar|LOVD|BIC|dbBRCA-Chinese|BMD|BED	Pathogenic
chr13	32914974	32914977	ACAA	-	c.6482_6485delACAA	p.Asp2161fs	rs80359598	1	1F	1 Het	exonic	frameshift deletion	dbBRCA-Chinese|ClinVar	Pathogenic
chr13	32915089	32915090	TT	-	c.6597_6598delTT	p.Thr2199fs	rs80359607	1	1F	1 Het	exonic	frameshift deletion	ClinVar	Pathogenic
chr13	32929367	32929370	AAAC	-	c.7377_7380delAAAC	p.Lys2459fs	rs80359648	1	1F	1 Het	exonic	frameshift deletion	ClinVar	Pathogenic
chr13	32929396	32929396	-	T	c.7407dupT	p.Thr2469fs	rs397507916	2	2F	2 Het	exonic	frameshift insertion	dbBRCA-Chinese	Pathogenic
chr13	32931999	32931999	C	T	c.7738C>T	p.Gln2580Ter	rs80358999	1	1F	1 Het	exonic	stopgain	ENIGMA|ClinVar|LOVD|BIC|dbBRCA-Chinese|BMD|BED	Pathogenic
chr13	32936732	32936732	G	A	c.7878G>A	p.Trp2626Ter	rs80359013	1	1M	1 Het	exonic	stopgain	ENIGMA|ClinVar|LOVD|BIC|dbBRCA-Chinese|BMD|BED	Pathogenic
chr13	32945138	32945139	AG	-	c.8533_8534delAG	p.Arg2845fs	rs80359714	1	1F	1 Het	exonic	frameshift deletion	ClinVar|BIC	Pathogenic
chr13	32954003	32954006	AACA	-	c.9070_9073delAACA	p.Asn3024fs	.	1	1F	1 Het	exonic	frameshift deletion	dbBRCA-Chinese	Pathogenic
chr13	32968951	32968951	C	T	c.9382C>T	p.Arg3128Ter	rs80359212	1	1F	1 Het	exonic	stopgain	ENIGMA|ClinVar|LOVD|BIC|dbBRCA-Chinese|BMD|BED	Pathogenic
*The variant was identified by this study and deposited in dbSNP
